# Supplementary material for: K4[Fe(CN)6] immobilized anion sensitive protonated amine functionalized polysilsesquioxane films for ultra-low electrochemical detection of dsDNA
Source: Royal Society of Chemistry journal article supplement (doi:10.1039/c6cp00283h), 2016-01-01
Supplement: c6cp00283h1.pdf [file c6cp00283h1.pdf]

## Electronic Supplementary Information

### **K<sub>4</sub>[Fe(CN)<sub>6</sub>] immobilized anion sensitive protonated amine functionalized polysilsesquioxane films for ultra-low electrochemical detection of dsDNA**

Krishnamoorthy Silambarasan, Alam Venugopal Narendra Kumar and James Joseph\*

Electrodeics and Electrocatalysis Division, CSIR-Central Electrochemical Research Institute, Karaikudi - 630003 (INDIA)

\*Corresponding author: James Joseph

Email: [jameskavalam@yahoo.com](mailto:jameskavalam@yahoo.com)

#### **Table of contents:**

#### **1. Experimental Procedure**

#### **2. Figures**

**Fig. S1.** Voltammetric response of different anionic redox couple immobilized GC/PSQs electrode.

**Fig. S2.** Electrochemical response of [Ru(NH<sub>3</sub>)<sub>6</sub>]<sup>2+/3+</sup> in GC/PSQs electrode.

**Fig. S3.** A plot of peak current vs square root of scan rate for different anions at pH=5.

**Fig. S4.** Effect of cation on cyclic voltammetry response of [Fe(CN)<sub>6</sub>]<sup>4-</sup> immobilized GC/PSQs electrode.

**Fig. S5.** FT-IR spectra of [Fe(CN)<sub>6</sub>]<sup>3-</sup>, [Fe(CN)<sub>6</sub>]<sup>4-</sup> and [Fe(CN)<sub>6</sub>]<sup>3-</sup> incorporated PSQs.

**Fig. S6.** Cyclic voltammetry response of partially converted PB containing ferri/ferro redox couple incorporated in GC/PSQs electrode against different concentration of KNO<sub>3</sub> (0.1M to 1.0 M).

**Fig. S7.** Log plot of current vs scan rate for different anions at pH=5.

**Fig. S8.** Cyclic voltammetry response of [Fe(CN)<sub>6</sub>]<sup>4-</sup> immobilized GC/PSQs electrode in different concentration of KCl.

**Fig. S9.** CV response of GC/PSQs electrode after dipping in 1 mM dsDNA (60 min) and its interaction with [Fe(CN)<sub>6</sub>]<sup>3-/4-</sup> and [Ru(NH<sub>3</sub>)<sub>6</sub>]<sup>2+/3+</sup> ions.

**Fig. S10.** CV response of [Fe(CN)<sub>6</sub>]<sup>4-</sup> incorporated GC/PSQs film after dipping in 1 mM dsDNA (0 min, 5 min, 10 min, 20 min, 30 min and 60 min) in 0.1 M KNO<sub>3</sub> solution

**Fig. S11.** AFM images of before and after dsDNA adsorbed [Fe(CN)<sub>6</sub>]<sup>4-</sup> incorporated GC/PSQs electrode.

**Table S1.** Electrochemical parameters calculated for different anions.

**Table S2.** Surface coverage ( $\theta$ ) and exchange current density ( $j_0$ ) values derived from impedance results.

**Table S3.** Analytical methods for DNA determination

**Scheme S1.** Mechanism of charge transport in  $[\text{Fe}(\text{CN})_6]^{4-}$  immobilized PSQs modified GC surface

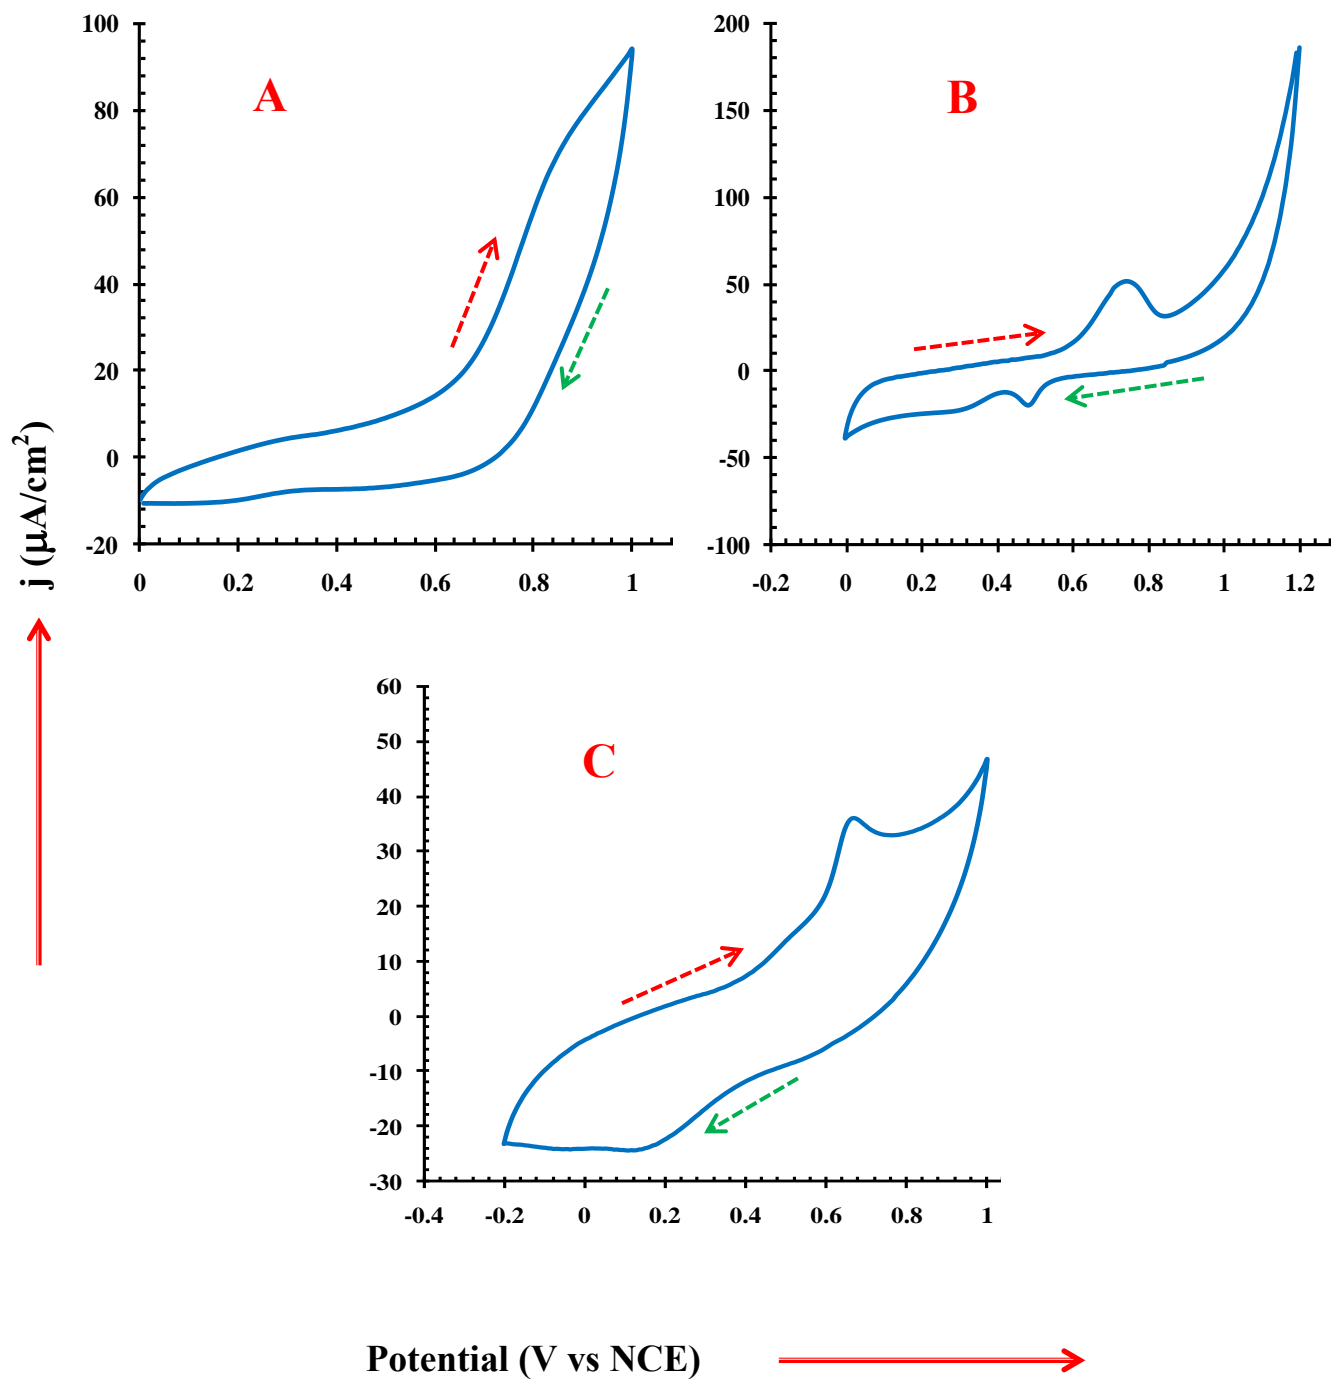

**Fig. S1.** Cyclic voltammeteric response of different anionic redox couple immobilized GC/PSQs electrode in 100 mM  $\text{KNO}_3$  solution: A)  $[\text{Ru}(\text{CN})_6]^{3-}$  B),  $\text{AuCl}_4^-$  and C)  $\text{I}^-$

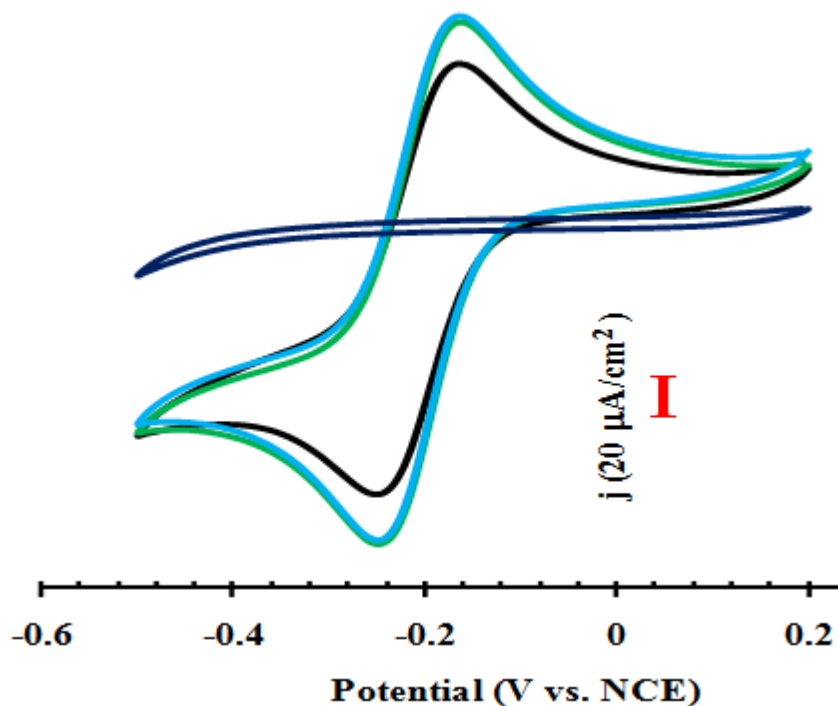

**Fig. S2.** Electrochemical response of  $[\text{Ru}(\text{NH}_3)_6]^{2+/3+}$  on GC surface in 0.1 M  $\text{KNO}_3$  (black), on GC/PSQs electrode in 0.1 M  $\text{KNO}_3$  (1 scan(cyan), 25 scan (green)) and GC/PSQs electrode response in 0.1 M  $\text{KNO}_3$  after electrochemical cycling (blue color).

Calculation of surface coverage ( $\Gamma$ ) of the redox indicator was calculated using

$$\Gamma = \frac{Q}{nFA} \quad (1)$$

Where 'Q' is the columbic charge in (C) and n,F, A are number of electrons involved, faraday constant and area of the electrode used respectively.

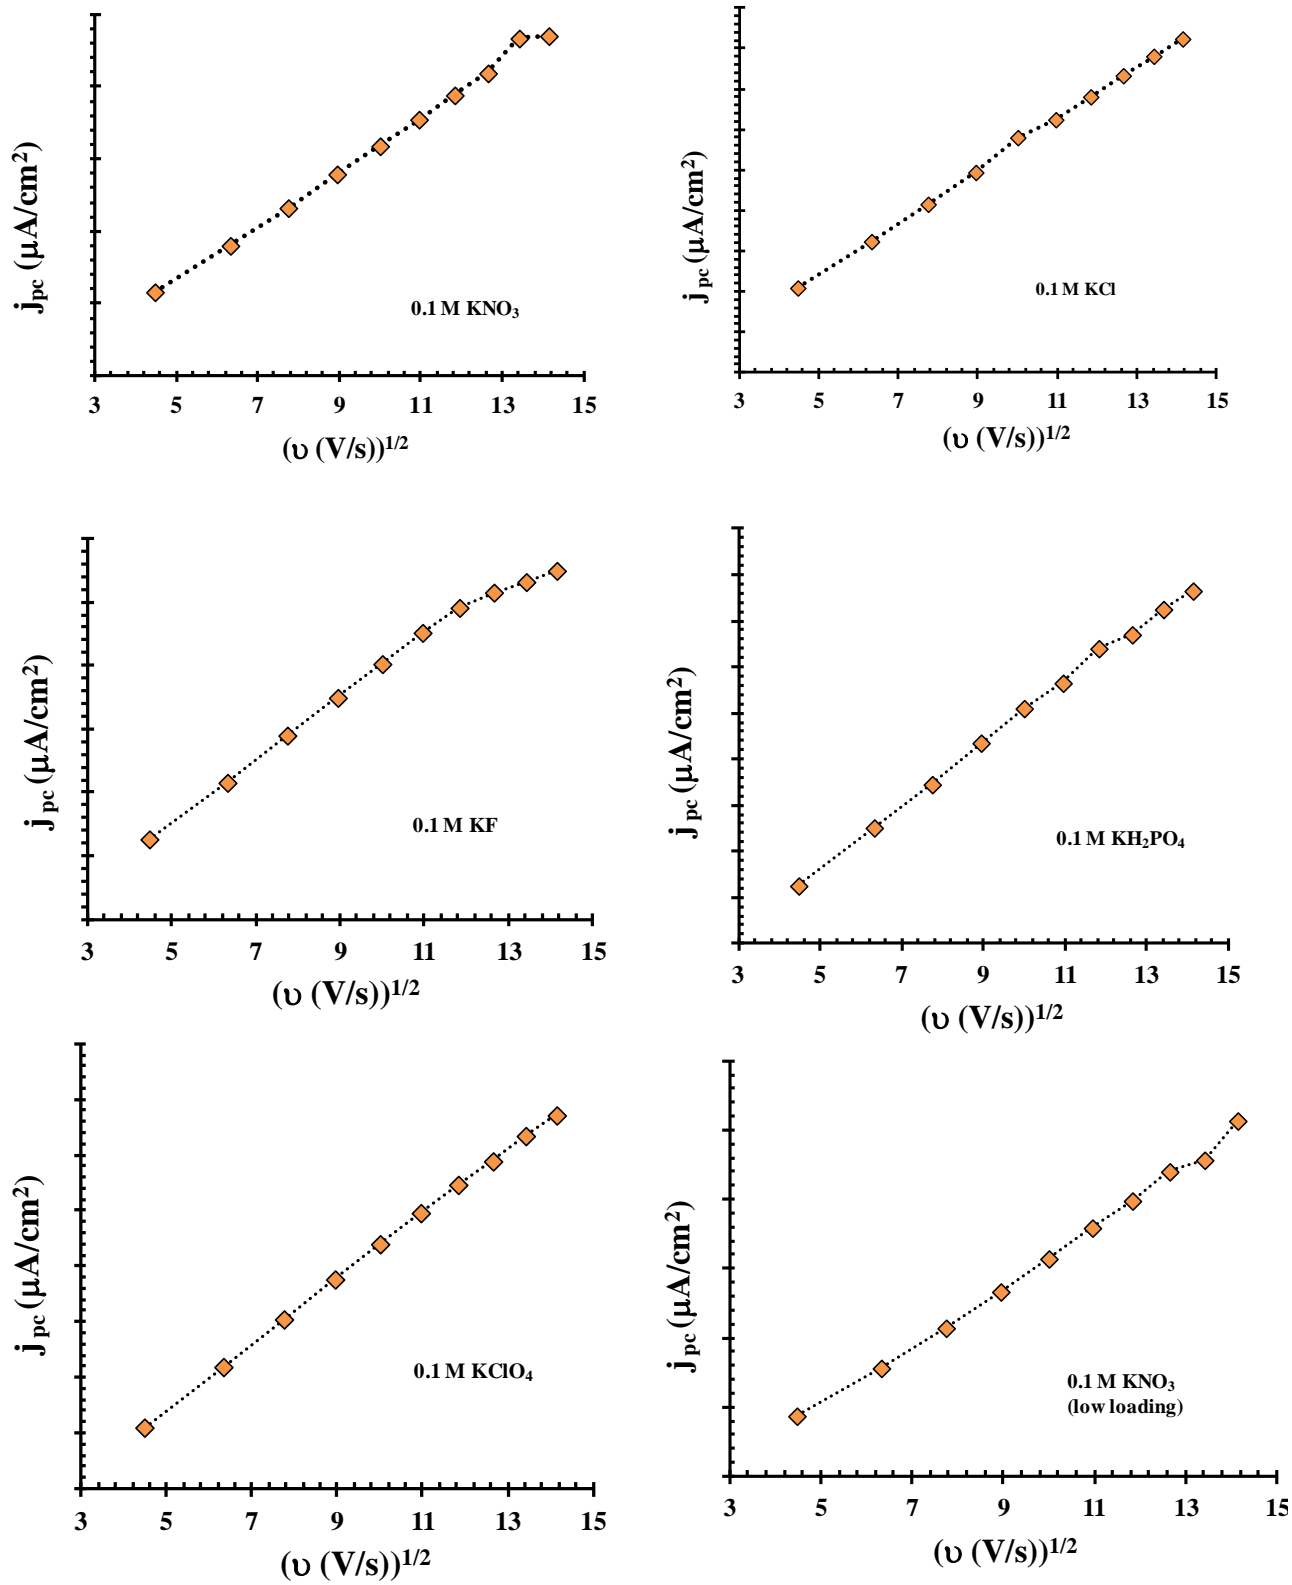

**Fig. S3.** A plot of peak current vs square root of scan rate for different anions at pH=5.

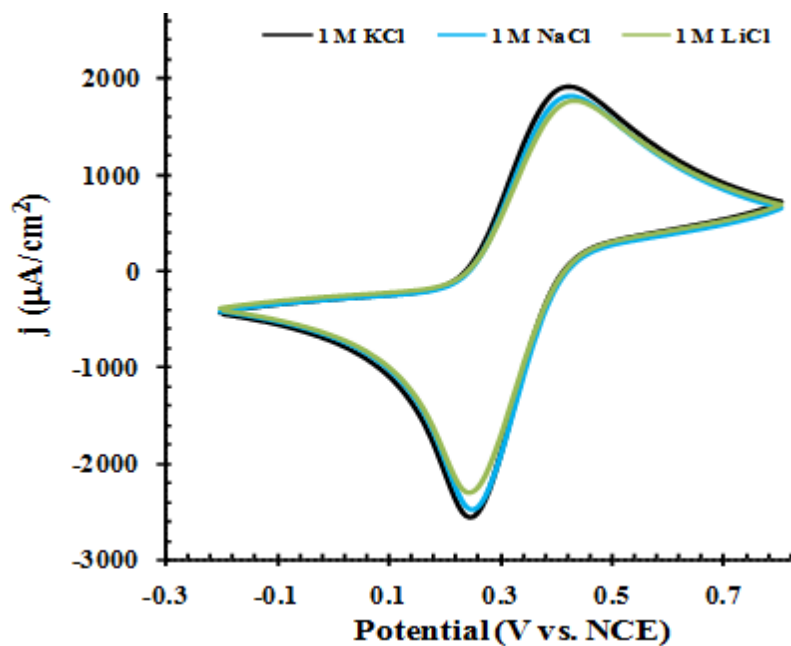

**Fig. S4.** Effect of cation on cyclic voltammetry response of  $[\text{Fe}(\text{CN})_6]^{4-}$  immobilized GC/PSQs electrode.

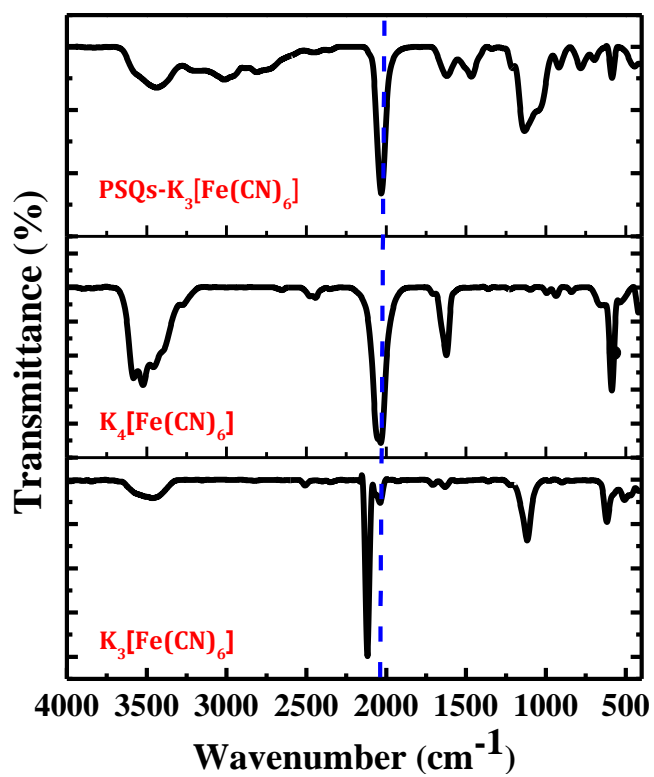

**Fig. S5.** FT-IR spectra of  $[\text{Fe}(\text{CN})_6]^{3-}$ ,  $[\text{Fe}(\text{CN})_6]^{4-}$  and  $[\text{Fe}(\text{CN})_6]^{3-}$  incorporated PSQs.

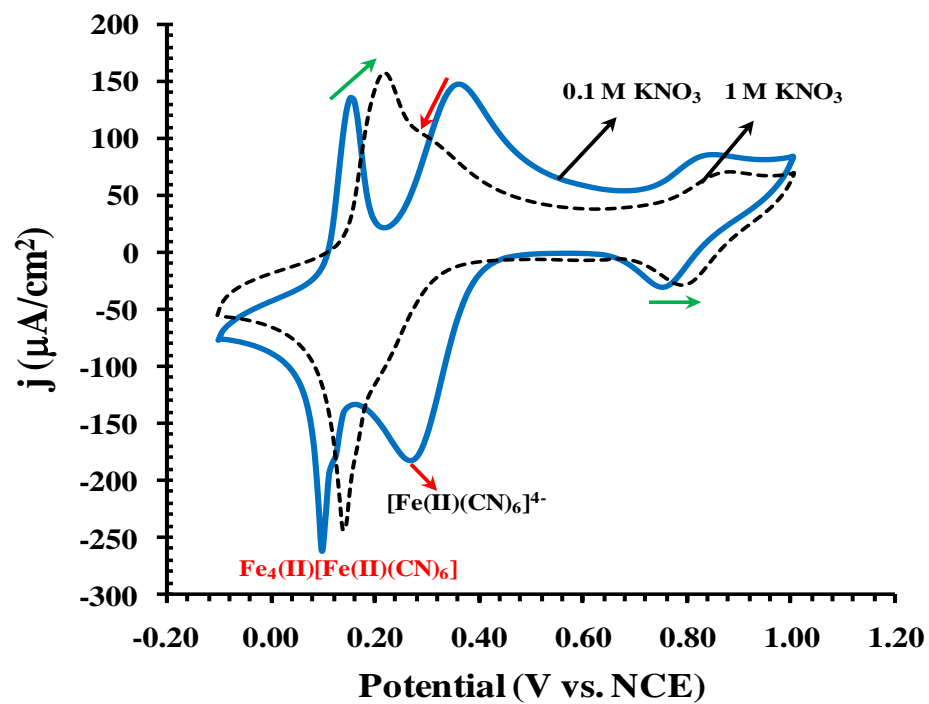

**Fig. S6.** Cyclic voltammetry response of partially converted PB containing ferri/ferro redox couple incorporated in GC/PSQs electrode against different concentration of  $\text{KNO}_3$  (0.1M to 1.0 M).

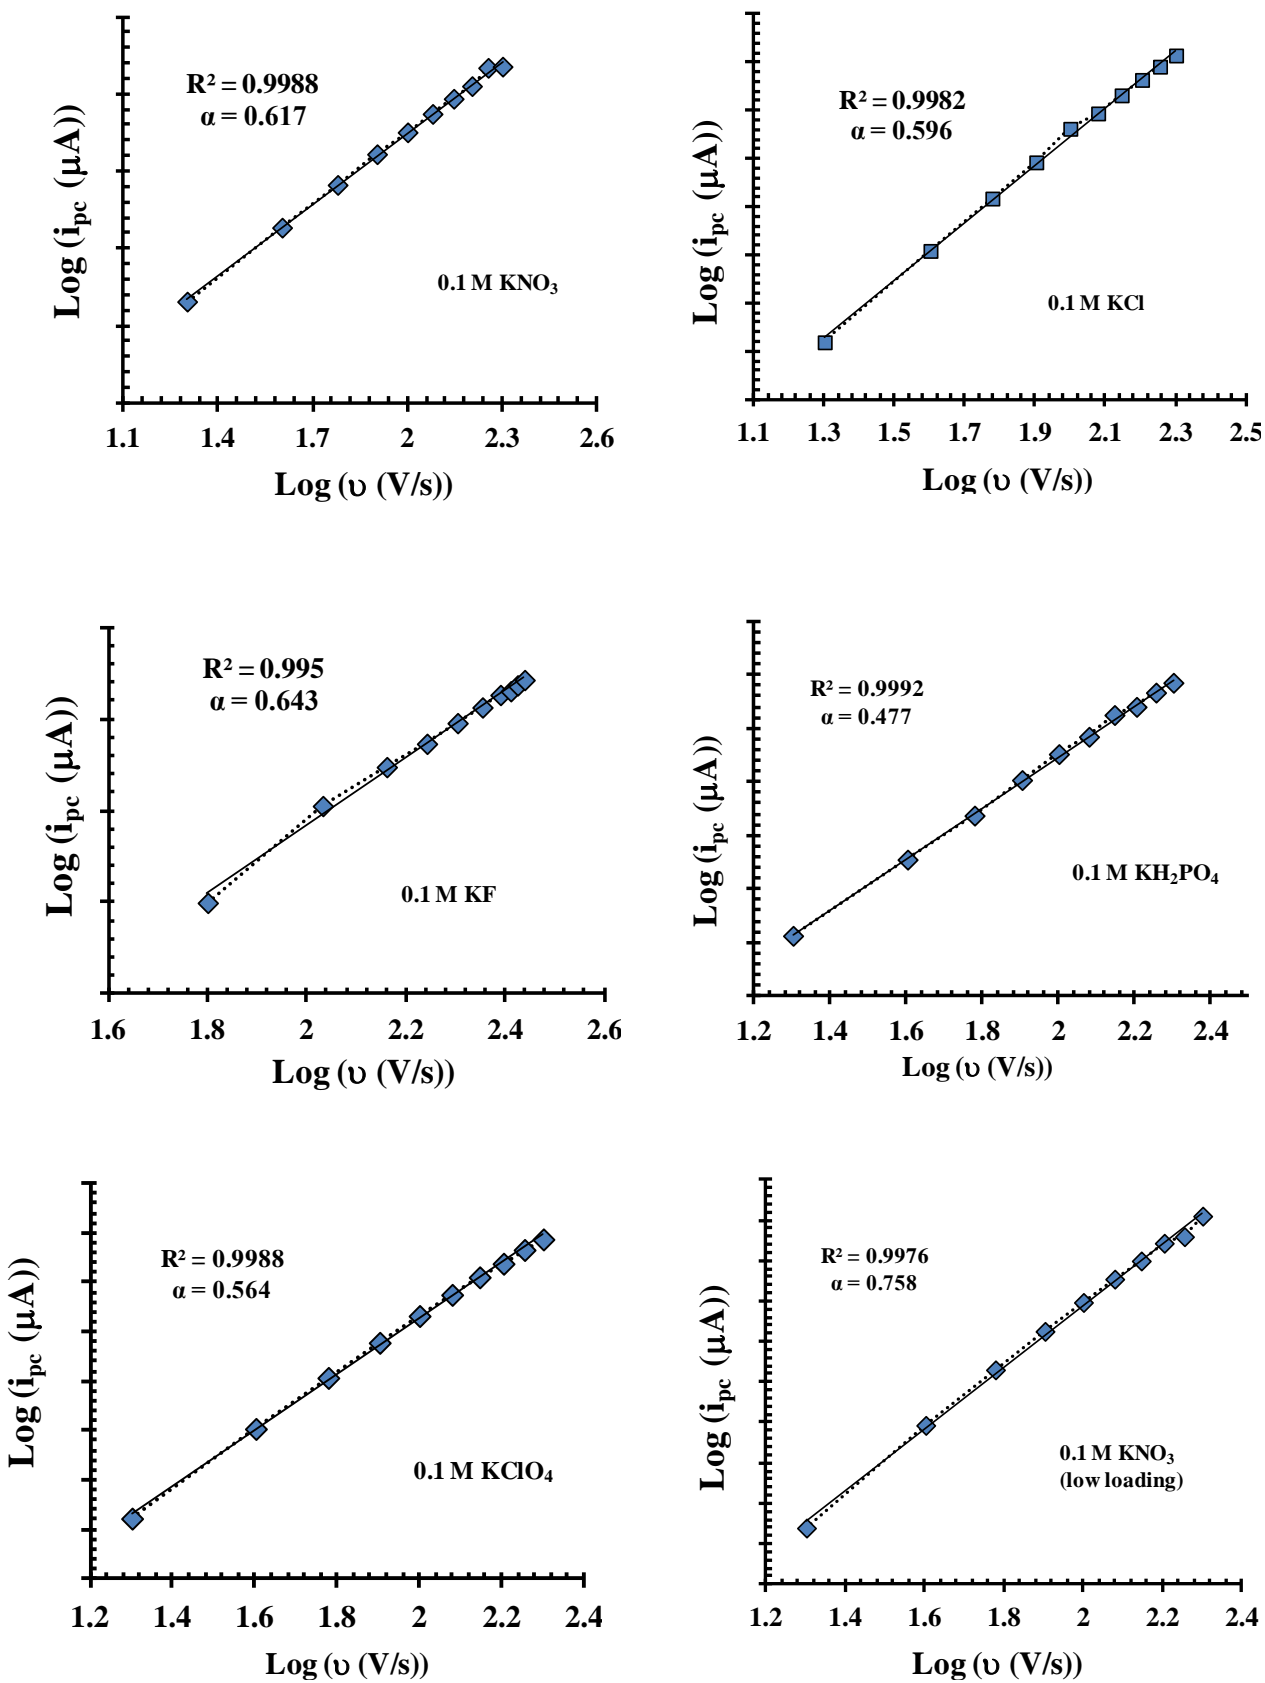

Fig. S7. Log plot of current vs scan rate for different anions at pH=5.



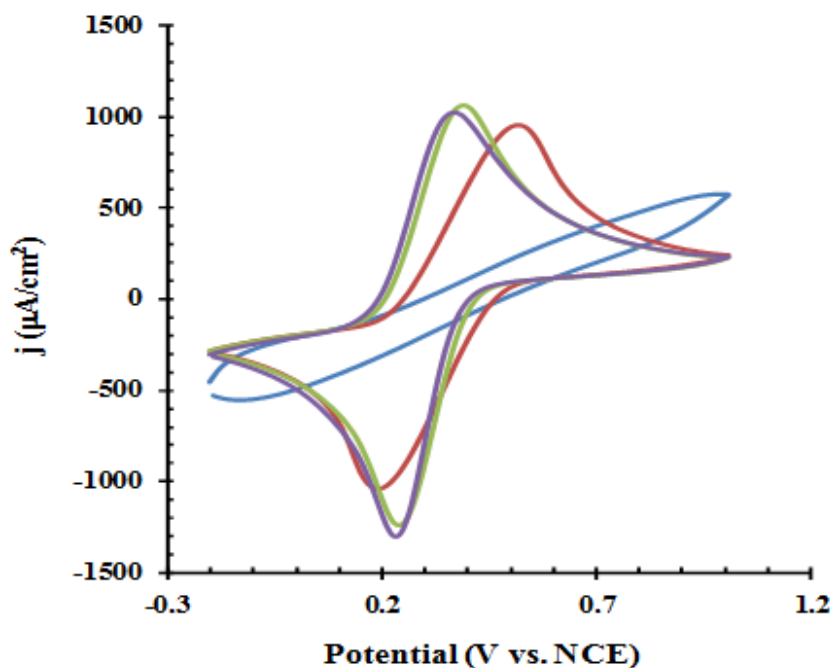

**Fig. S8.** Electrochemical response of  $[\text{Fe}(\text{CN})_6]^{4-}$  immobilized GC/PSQs in different concentration of KCl, 1 mM (blue), 10 mM (red), 30 mM (green) and 50 mM (violet). [Redox free solution]

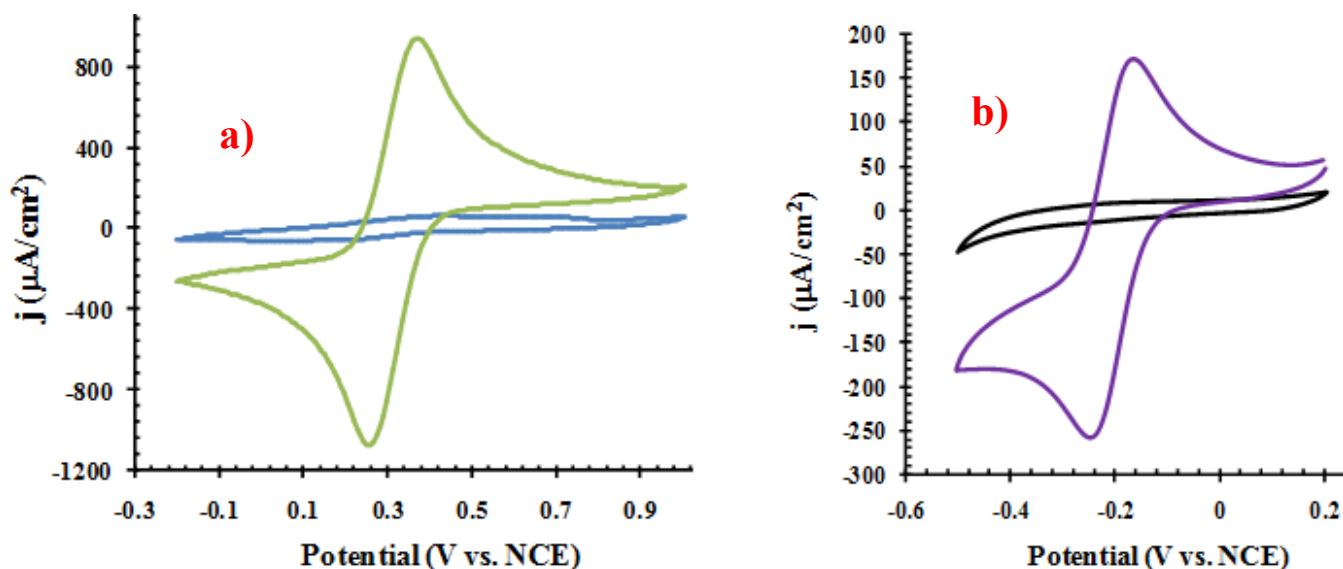

**Fig. S9.** CV response of GC/ PSQs in 0.1 M  $\text{KNO}_3$  after dipping in 1 mM dsDNA (60 min) a) blue line after electrochemical cycling in ferricyanide (50 cycle) and green line is  $[\text{Fe}(\text{CN})_6]^{3-/4-}$  response on GC surface, b) black line is after electrochemical cycling in  $[\text{Ru}(\text{NH}_3)_6]^{3+/2+}$  and violet line is  $[\text{Ru}(\text{NH}_3)_6]^{3+/2+}$  response on GC surface.

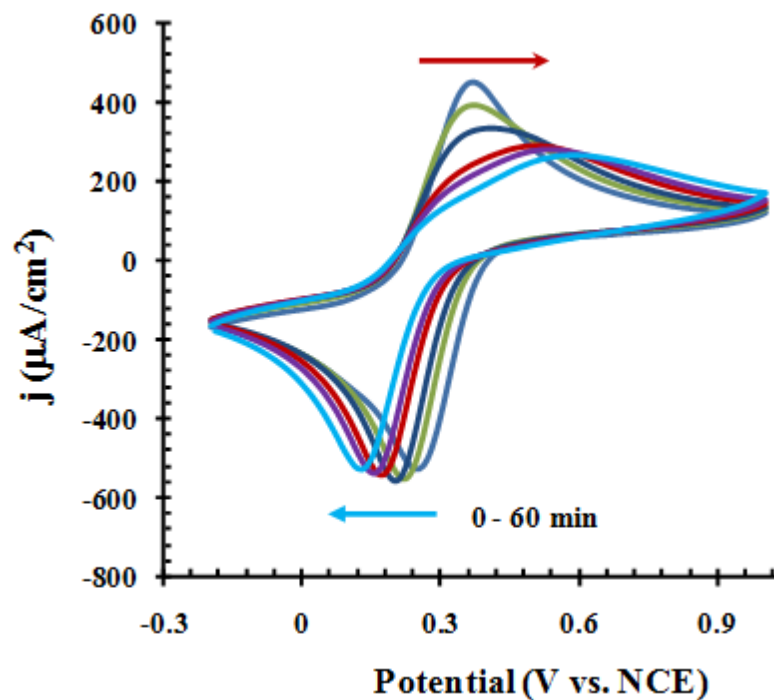

**Fig. S10.** CV response of  $[\text{Fe}(\text{CN})_6]^{4-}$  incorporated GC/PSQs film after dipping in 1 mM dsDNA (0 min, 5 min, 10 min, 20 min, 30 min and 60 min) in 0.1 M  $\text{KNO}_3$  solution

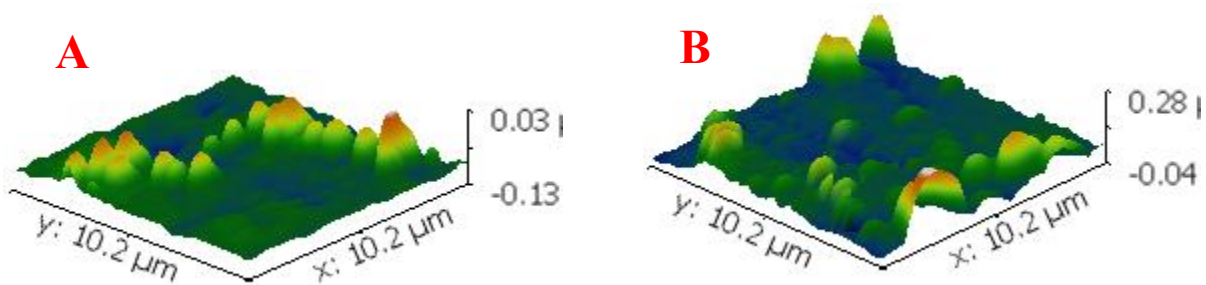

**Fig. S11.** AFM images of before (A) and after dsDNA (B) adsorbed  $[\text{Fe}(\text{CN})_6]^{4-}$  incorporated GC/PSQs electrode.

**Table S1.** Electrochemical parameters calculated for different anions.

| Anions                          | $E^0$ | $\Delta E_p$ (V) | $\alpha$ |
|---------------------------------|-------|------------------|----------|
| KNO <sub>3</sub>                | 0.30  | 0.097            | 0.61     |
| KCl                             | 0.32  | 0.097            | 0.59     |
| KF                              | 0.27  | 0.095            | 0.64     |
| KClO <sub>4</sub>               | 0.31  | 0.132            | 0.56     |
| KH <sub>2</sub> PO <sub>4</sub> | 0.25  | 0.092            | 0.47     |

**Table S2.** Surface coverage ( $\theta$ ) and exchange current density ( $j_0$ ) values derived from impedance results.

Equilibrium exchange current density of redox indicator with increasing surface concentration of dsDNA was calculated using the equation given below. The parameters present in the equation has its own significance gas constant (R), temperature (T), number of electrons involved (n), Faraday constant (F), area of the electrode (A) and charge transfer resistance ( $R_{ct}$ )

$$j_0 = \frac{RT}{nFAR_{ct}} \quad (2)$$

| dsDNA concentration | $\theta$ [%] | $j_0$ (A.cm <sup>-2</sup> ) | SD (%)                 |
|---------------------|--------------|-----------------------------|------------------------|
| 0                   | 0            | 1.746x10 <sup>-3</sup>      | 5.81 x10 <sup>-5</sup> |
| 0.5 aM              | 54.6         | 7.922x10 <sup>-4</sup>      | 3.04x10 <sup>-6</sup>  |
| 1 aM                | 72.8         | 4.745x10 <sup>-4</sup>      | 6.86x10 <sup>-6</sup>  |
| 1 fM                | 83.3         | 2.899x10 <sup>-4</sup>      | 8.79x10 <sup>-6</sup>  |
| 1 pM                | 87.8         | 2.115x10 <sup>-4</sup>      | 4.23x10 <sup>-6</sup>  |
| 1 nM                | 90.8         | 1.594x10 <sup>-4</sup>      | 2.67x10 <sup>-6</sup>  |
| 1 $\mu$ M           | 92.3         | 1.329x10 <sup>-4</sup>      | 9.12x10 <sup>-6</sup>  |
| 1 mM                | 93.3         | 1.155x10 <sup>-4</sup>      | 7.45x10 <sup>-6</sup>  |

**Table S3.** Analytical methods for DNA determination

| DNA detection methods                                                                             | Techniques    | Detection limits                                                                       |
|---------------------------------------------------------------------------------------------------|---------------|----------------------------------------------------------------------------------------|
| <b>Electrochemical methods</b>                                                                    |               |                                                                                        |
| 1) Potentiometric detection                                                                       | Potentiometry | 10 pM <sup>1</sup>                                                                     |
| 2) DNA hybridization (Nano ensembles, Electroactive and magnetic beads, conducting polymer etc.,) | Voltammetry   | 5 aM <sup>2</sup> , 400 fM <sup>3</sup> , 1 fM <sup>4</sup><br>& 20 aM <sup>5</sup>    |
| 3) Electronic transduction                                                                        | Impedance     | 200 aM <sup>6</sup> , 3.5x10 <sup>-13</sup> M <sup>7</sup> ,<br>0.5 nM <sup>8</sup>    |
| <b>Fluorescence spectroscopy</b>                                                                  |               |                                                                                        |
| <b>Colorimetric analysis</b>                                                                      |               |                                                                                        |
|                                                                                                   |               | 1 aM <sup>9</sup> , 4.5 fM <sup>10</sup><br>20 aM <sup>11</sup> , 100 pM <sup>12</sup> |

**References:**

- 1 a Numnuam, K. Y. Chumbimuni-Torres, Y. Xiang, R. Bash, P. Thavarungkul, P. Kanatharana, E. Pretsch, J. Wang and E. Bakker, *J. Am. Chem. Soc.*, 2008, **130**, 410–411.
- 2 R. Gasparac, B. J. Taft, M. a Lapierre-devlin, A. D. Lazareck, J. M. Xu and S. O. Kelley, *J. Am. Chem. Soc.*, 2004, **126**, 12270–12271.
- 3 M. R. Gore, V. a. Szalai, P. a. Ropp, I. V. Yang, J. S. Silverman and H. H. Thorp, *Anal. Chem.*, 2003, **75**, 6586–6592.
- 4 H. Chang, Y. Yuan, N. Shi and Y. Guan, *Anal. Chem.*, 2007, **79**, 5111–5115.
- 5 E. E. Ferapontova, M. N. Hansen, A. M. Saunders, S. Shipovskov, D. S. Sutherland and K. V. Gothelf, *Chem. Commun. (Camb)*, 2010, **46**, 1836–1838.
- 6 T. Kurkina, A. Vlandas, A. Ahmad, K. Kern and K. Balasubramanian, *Angew. Chemie - Int. Ed.*, 2011, **50**, 3710–3714.
- 7 M. Wang, W. Gong, Q. Meng and Y. Zhang, *Russ. J. Electrochem.*, 2011, **47**, 1368–1373.
- 8 H. Peng, L. Zhang, C. Soeller and J. Travas-Sejdic, *Macromolecules*, 2007, **40**, 909–913.
- 9 J. Zhou, Q. Wang and C. Zhang, *J. Am. Chem. Soc.*, 2013, **135**, 2056–9.
- 10 Y. Zhao, C. Hao, W. Ma, Q. Yong, W. Yan, H. Kuang, L. Wang and C. Xu, *J. Phys. Chem. C*,

2011, **115**, 20134–20140.

11 W. Shen, H. Deng and Z. Gao, *J. Am. Chem. Soc.*, 2012, **134**, 14678–81.

12 P. Liu, X. Yang, S. Sun, Q. Wang, K. Wang, J. Huang, J. Liu and L. He, *Anal. Chem.*, 2013, **85**, 7689–95.

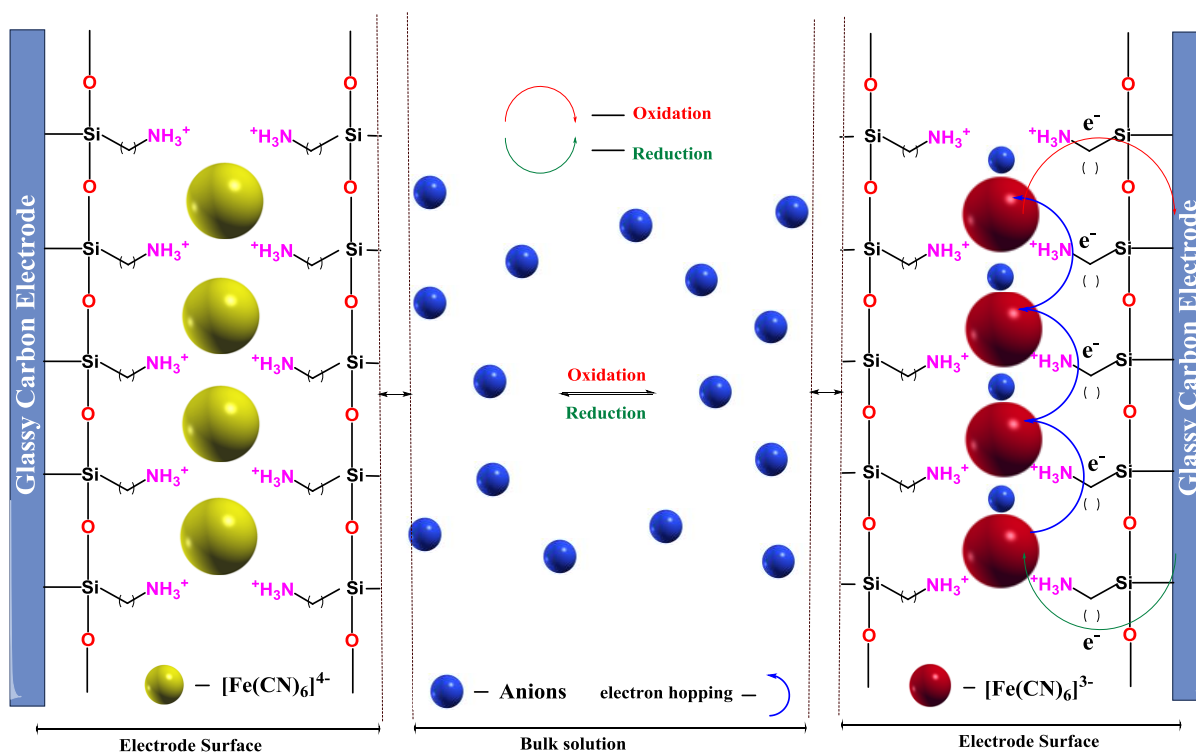

**Scheme S1.** Mechanism of charge transport in  $[\text{Fe}(\text{CN})_6]^{4-}$  immobilized PSQs modified GC surface.
